# Supplementary material for: Do Exercise, Physical Activity, Dietetic, or Combined Interventions Improve Body Weight in New Kidney Transplant Recipients? A Narrative Systematic Review and Meta-Analysis
Source: MDPI journal article supplement (doi:10.3390/kidneydial1020014), 2021-10-02
Supplement: s1 [file s1]

Archive with 1 entries (1 files):
- kidneydial-1354819-supplementary.pdf
